# Supplementary material
Source: publisher site journal article supplement (https://www.dovepress.com/article/388164)
Supplement: Supplementary file 1 [file get_supplementary_file.php]

**A systematic review assessing patient related predictors of response to transcranial magnetic stimulation in major depressive disorder**

Fernando Gonterman

PROSPERO ID: CRD42022362462

**Supplementary materials**

*Search strategy, first search p2.*

*Second search p3.*

**Search strategy**

*Search 1 (From 1986 up until December 5th 2022)*

Pubmed:

“predictors transcranial magnetic stimulation”

Total: 375 results

Under “Article Type”, the following filters were applied: “Clinical Trial” and “Randomized Controlled Trial”

Number of articles removed once filters applied: 314

Total: 61

Excluded based on abstract:

- Non-eligible population: 7
- Non-eligible disease: 34
- Non-eligible publication type: 1
- Non-eligible treatment method: 5
- Non-eligible study design: 9
- Animal study: 0
- Non-eligible outcome: 1
- Duplicate: 2

Total included based on abstract: 2

Excluded based on full text: 0

- Non-eligible publication type: 0
- Same population: 0
- Full text unavailable: 0
- Non-eligible population: 0
- Non-eligible treatment method: 1
- Non-eligible study design: 0

Total included based on full text: 1

Articles excluded due to missing information: 0

**Total included: 1**

*Search 2*

Articles identified by scanning the reference lists of articles from the initial search: 18

Excluded based on full text: 0

- Non-eligible publication type: 0
- Same population: 0
- Full text unavailable: 0
- Non-eligible population: 0
- Non-eligible treatment method:
- Non-eligible study design: 0

Articles excluded due to missing information: 1

Total included based on full text: 17

**Total included after first search and second search combined: 18**
